# Supplementary material for: Multicellular tumor spheroid models to explore cell cycle checkpoints in 3D
Source: PubMed Central journal article supplement (PMC3598667; doi:10.1186/1471-2407-13-73), 2013-02-08
Supplement: 1471-2407-13-73-S1.pdf [file 1471-2407-13-73-S1.pdf]

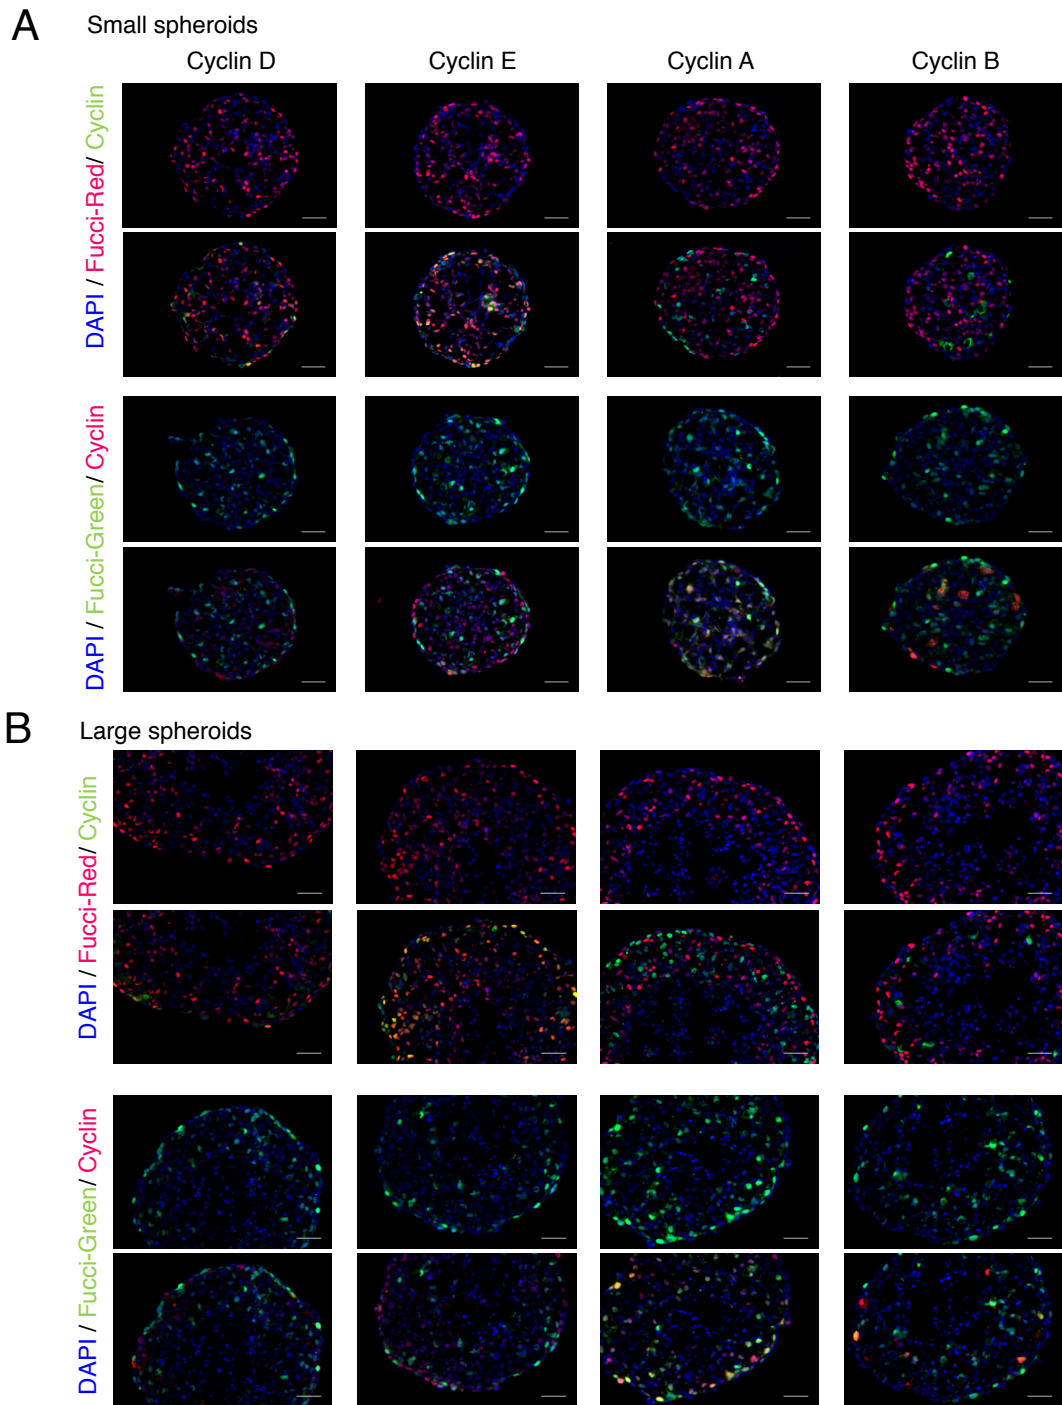

**Additional file 1.**

Characterization of Fucci-red and Fucci-green expressing spheroids. Immunostaining of Fucci-red and Fucci-green expressing cells with antibodies directed against cyclin D, cyclin E, cyclin A and cyclin B on small (A) and large (B) spheroids.
