# Supplementary material for: Multicellular tumor spheroid models to explore cell cycle checkpoints in 3D
Source: PubMed Central journal article supplement (PMC3598667; doi:10.1186/1471-2407-13-73), 2013-02-08
Supplement: 1471-2407-13-73-S2.pdf [file 1471-2407-13-73-S2.pdf]

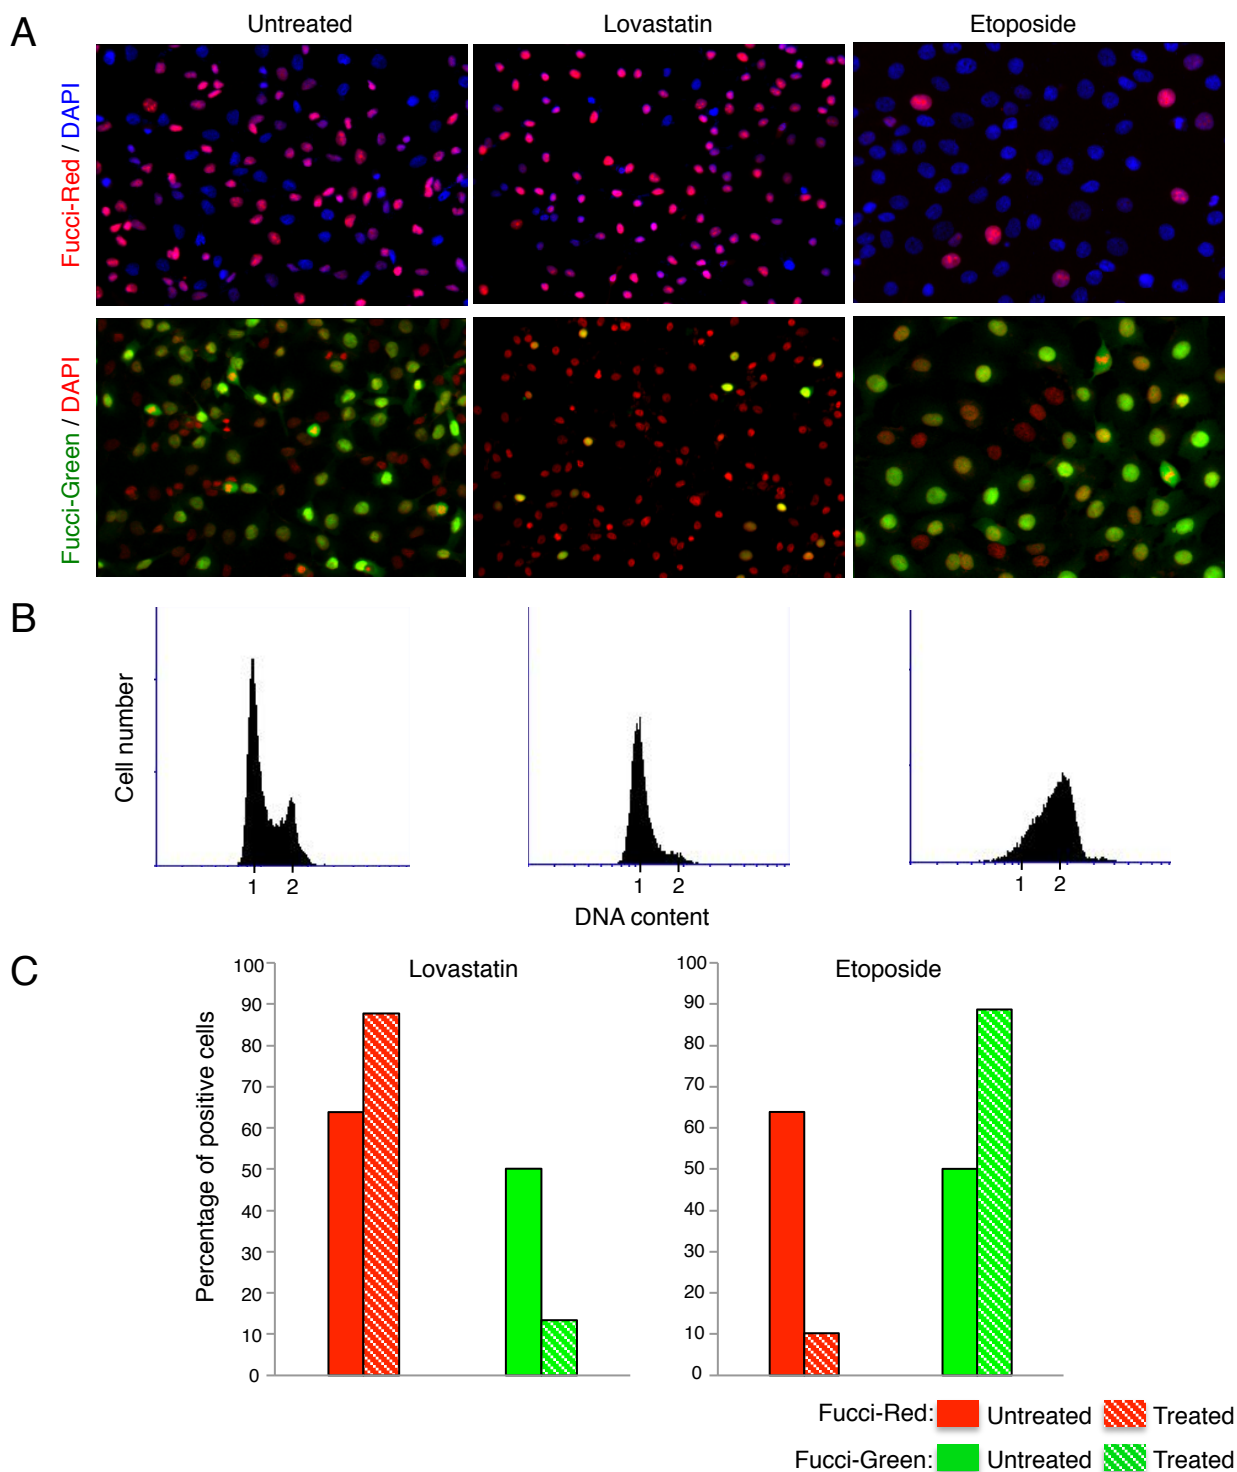

**Additional file 2.**

Characterization of the effects of lovastatin and etoposide on Capan-2 cells lines expressing Fucci reporters. Capan-2 cell lines cultured as monolayers and treated or not with lovastatin (60  $\mu$ M, 48 hours) or etoposide (40 $\mu$ M, 1 hour). (A) Visualization of Fucci-red and Fucci-green expressing cells. (B) Flow cytometry analysis of DNA content after DRAQ5 staining. (C) Quantification of the percentage of Fucci-red and Fucci-green expressing cells.
