# Supplementary material for: Multicellular tumor spheroid models to explore cell cycle checkpoints in 3D
Source: PubMed Central journal article supplement (PMC3598667; doi:10.1186/1471-2407-13-73), 2013-02-08
Supplement: 1471-2407-13-73-S3.pdf [file 1471-2407-13-73-S3.pdf]

Phospho-H2AX/DAPI

Untreated

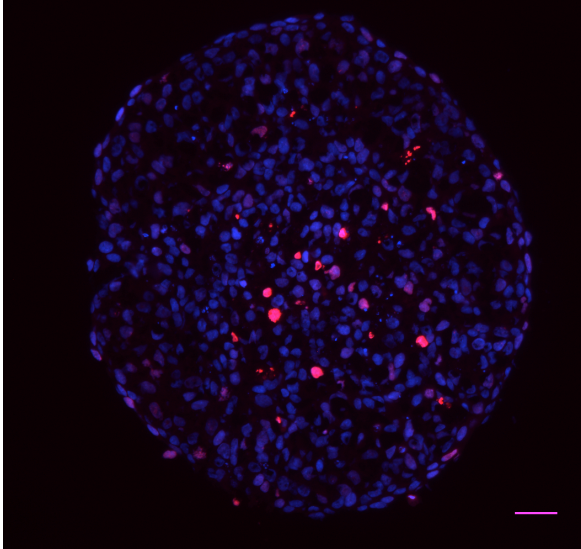

Etoposide 5 $\mu$ M

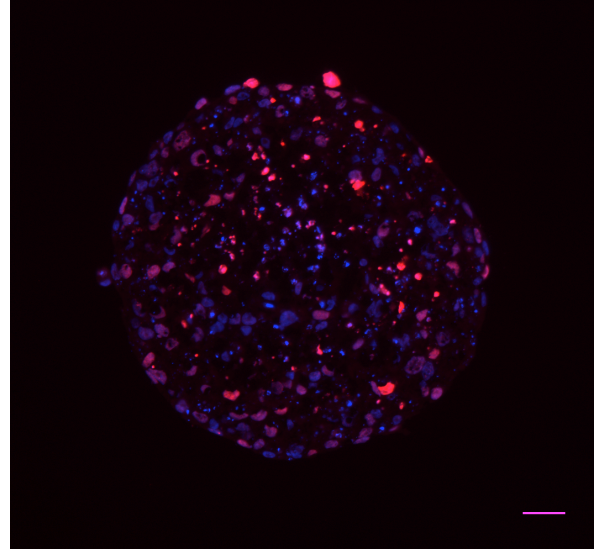

### Additional file 3.

Etoposide treatment-induced DNA damage in MCTS.

Capan-2 MCTS were treated or not with 5 $\mu$ M etoposide for 48 hours. The genotoxic effect of etoposide was analyzed by immunodetection of the phosphorylation of the H2AX histone variant (red) on frozen sections. Nuclei are stained with DAPI (blue). Scale bar: 50 $\mu$ m
